# Supplementary material for: A novel decanuclear Co(ii) cluster with adamantane-like metallic skeleton supported by 8-hydroxyquinoline and in situ formed CO32− anions
Source: Royal Society of Chemistry journal article supplement (doi:10.1039/c2dt30102d), 2012-01-01
Supplement: c2dt30102d.pdf [file c2dt30102d.pdf]

A Novel Decanuclear Co(II) Cluster with Adamantane-like  
Metallic Skeleton Supported by 8-Hydroxyquinoline and *In-situ*  
Formed CO<sub>3</sub><sup>2-</sup> Anions

Lei Wang, Yi Li, Yu Peng, Zhiqiang Liang,\* Jihong Yu and Ruren Xu

State Key Lab of Inorganic Synthesis and Preparative Chemistry, Jilin University,

Changchun, 130012, P. R. China

Email: [liangzq@jlu.edu.cn](mailto:liangzq@jlu.edu.cn)

Tel: +86-431-85168609, Fax: +86-431-85168609

**Contents:**

Figure S1. The Optical micrographs of [Co<sub>10</sub>(Q)<sub>12</sub>(μ<sub>6</sub>-CO<sub>3</sub>)<sub>4</sub>]·2.5DMF (**1**).

Figure S2. Experimental polycrystalline (black) and calculated from the single-crystal data X-ray powder diffraction (red) of **1**.

Figure S3. FT-IR spectrum of **1**.

Figure S4. TG analysis of **1** under Air atmosphere.

Table S1. Selected Bond Lengths [Å] and Angles [°] for **1**.

Figure S1. The Optical micrographs of  $[\text{Co}_{10}(\text{Q})_{12}(\mu_6\text{-CO}_3)_4] \cdot 2.5\text{DMF}$  (**1**).

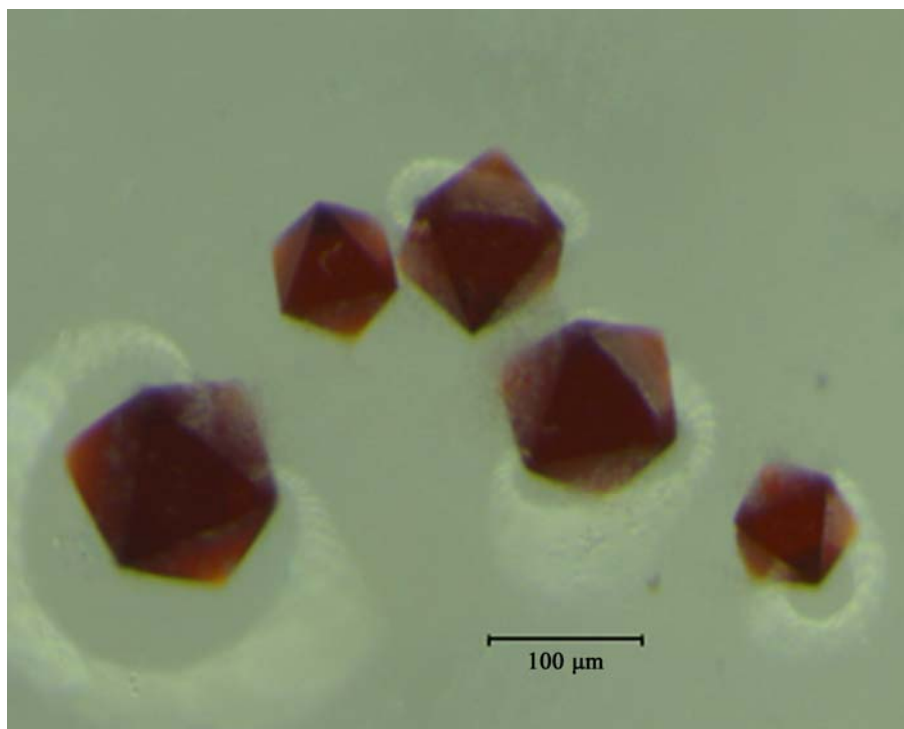

Figure S2. Experimental polycrystalline (black) and calculated from the single-crystal data X-ray powder diffraction (red) of **1**.

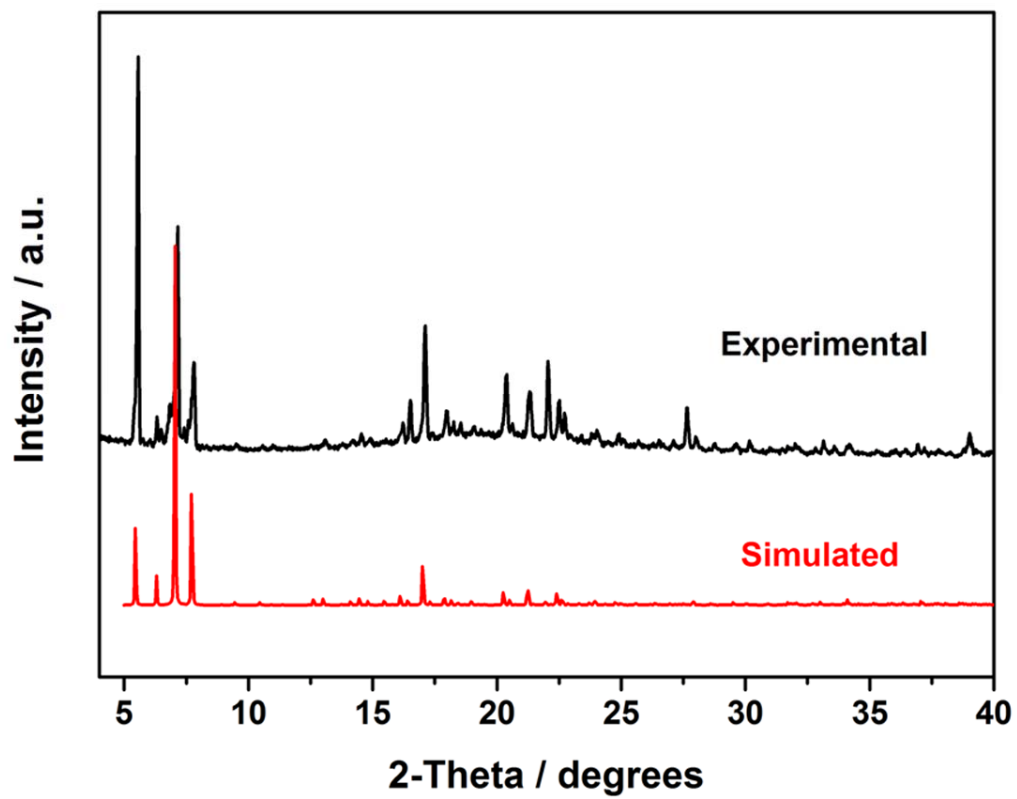

Figure S3. FT-IR spectrum of **1**.

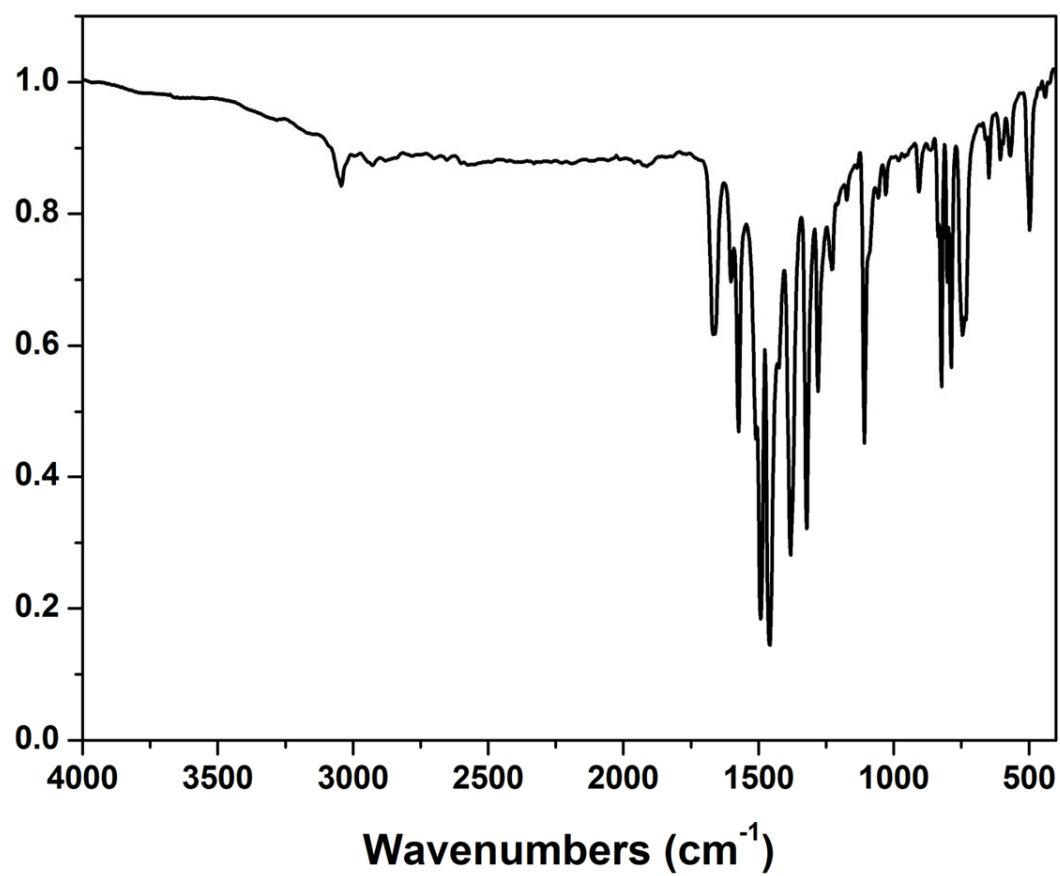

Figure S4. TG analysis of **1** under Air atmosphere.

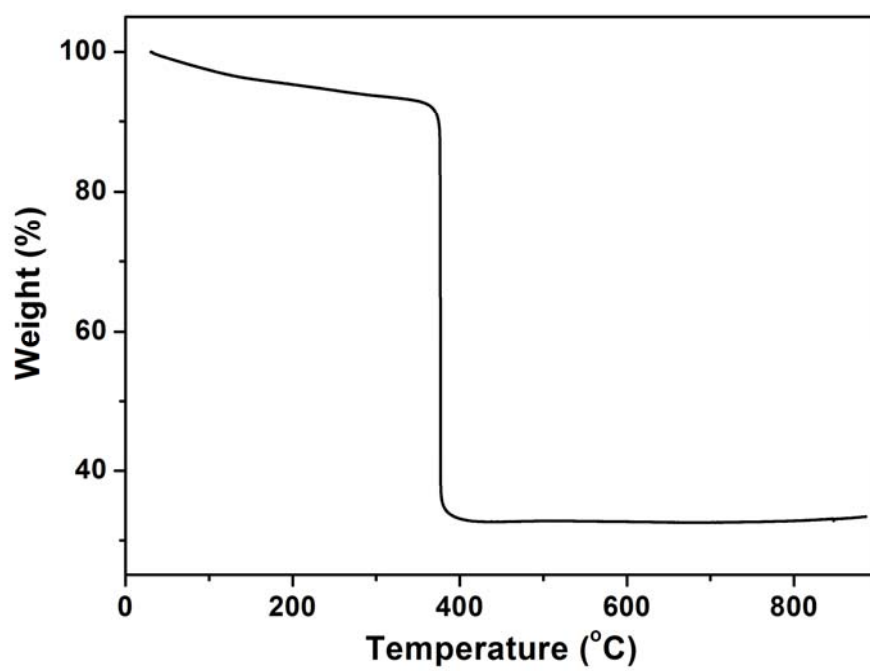

Table S1. Selected Bond Lengths [Å] and Angles [°] for **1**.

|                 |            |                     |            |
|-----------------|------------|---------------------|------------|
| Co(1)-O(5)      | 2.085(3)   | Co(3)-O(4)#2        | 2.054(3)   |
| Co(1)-N(1)      | 2.086(5)   | Co(3)-O(4)          | 2.054(3)   |
| Co(1)-O(7)      | 2.108(3)   | Co(3)-O(4)#1        | 2.054(3)   |
| Co(1)-N(2)      | 2.116(4)   | Co(3)-O(6)#2        | 2.158(3)   |
| Co(1)-O(1)      | 2.116(3)   | Co(3)-O(6)#1        | 2.158(3)   |
| Co(1)-O(2)      | 2.127(3)   | Co(3)-O(6)          | 2.158(3)   |
| Co(2)-O(8)      | 2.079(3)   | Co(4)-O(1)          | 2.049(3)   |
| Co(2)-O(4)      | 2.080(4)   | Co(4)-O(3)          | 2.055(3)   |
| Co(2)-N(3)      | 2.083(3)   | Co(4)-O(2)#1        | 2.079(3)   |
| Co(2)-O(3)      | 2.088(3)   | Co(4)-O(7)#1        | 2.129(3)   |
| Co(2)-N(4)      | 2.099(4)   | Co(4)-O(5)          | 2.138(3)   |
| Co(2)-O(6)#1    | 2.115(3)   | Co(4)-O(8)          | 2.188(3)   |
| O(5)-Co(1)-N(1) | 152.71(18) | O(4)#2-Co(3)-O(4)   | 104.55(10) |
| O(5)-Co(1)-O(7) | 84.33(12)  | O(4)#2-Co(3)-O(4)#1 | 104.55(10) |
| N(1)-Co(1)-O(7) | 97.84(16)  | O(4)-Co(3)-O(4)#1   | 104.55(10) |
| O(5)-Co(1)-N(2) | 89.44(15)  | O(4)#2-Co(3)-O(6)#2 | 77.48(12)  |
| N(1)-Co(1)-N(2) | 101.70(17) | O(4)-Co(3)-O(6)#2   | 85.37(12)  |
| O(7)-Co(1)-N(2) | 148.27(16) | O(4)#1-Co(3)-O(6)#2 | 168.76(12) |
| O(5)-Co(1)-O(1) | 74.62(13)  | O(4)#2-Co(3)-O(6)#1 | 168.76(12) |
| N(1)-Co(1)-O(1) | 78.60(18)  | O(4)-Co(3)-O(6)#1   | 77.48(12)  |
| O(7)-Co(1)-O(1) | 105.16(13) | O(4)#1-Co(3)-O(6)#1 | 85.37(12)  |

---

|                   |            |                     |            |
|-------------------|------------|---------------------|------------|
| N(2)-Co(1)-O(1)   | 103.06(16) | O(6)#2-Co(3)-O(6)#1 | 91.77(12)  |
| O(5)-Co(1)-O(2)   | 110.92(13) | O(4)#2-Co(3)-O(6)   | 85.37(12)  |
| N(1)-Co(1)-O(2)   | 95.81(18)  | O(4)-Co(3)-O(6)     | 168.76(12) |
| O(7)-Co(1)-O(2)   | 75.09(13)  | O(4)#1-Co(3)-O(6)   | 77.48(12)  |
| N(2)-Co(1)-O(2)   | 78.25(16)  | O(6)#2-Co(3)-O(6)   | 91.77(12)  |
| O(1)-Co(1)-O(2)   | 174.40(14) | O(6)#1-Co(3)-O(6)   | 91.77(12)  |
| O(8)-Co(2)-O(4)   | 156.22(16) | O(1)-Co(4)-O(3)     | 107.11(13) |
| O(8)-Co(2)-N(3)   | 105.86(12) | O(1)-Co(4)-O(2)#1   | 103.72(13) |
| O(4)-Co(2)-N(3)   | 97.61(15)  | O(3)-Co(4)-O(2)#1   | 106.03(13) |
| O(8)-Co(2)-O(3)   | 77.34(13)  | O(1)-Co(4)-O(7)#1   | 165.13(13) |
| O(4)-Co(2)-O(3)   | 79.13(16)  | O(3)-Co(4)-O(7)#1   | 87.10(13)  |
| N(3)-Co(2)-O(3)   | 176.64(13) | O(2)#1-Co(4)-O(7)#1 | 75.66(12)  |
| O(8)-Co(2)-N(4)   | 94.20(15)  | O(1)-Co(4)-O(5)     | 74.86(13)  |
| O(4)-Co(2)-N(4)   | 93.89(17)  | O(3)-Co(4)-O(5)     | 165.32(13) |
| N(3)-Co(2)-N(4)   | 79.29(15)  | O(2)#1-Co(4)-O(5)   | 87.25(13)  |
| O(3)-Co(2)-N(4)   | 101.65(15) | O(7)#1-Co(4)-O(5)   | 90.28(12)  |
| O(8)-Co(2)-O(6)#1 | 83.09(12)  | O(1)-Co(4)-O(8)     | 86.25(12)  |
| O(4)-Co(2)-O(6)#1 | 98.40(15)  | O(3)-Co(4)-O(8)     | 75.64(13)  |
| N(3)-Co(2)-O(6)#1 | 77.82(12)  | O(2)#1-Co(4)-O(8)   | 168.60(13) |
| O(3)-Co(2)-O(6)#1 | 101.76(13) | O(7)#1-Co(4)-O(8)   | 93.28(12)  |
| N(4)-Co(2)-O(6)#1 | 155.22(15) | O(5)-Co(4)-O(8)     | 90.11(12)  |
| Co(4)-O(1)-Co(1)  | 99.59(14)  | Co(1)-O(5)-Co(4)    | 97.74(13)  |

---

---

|                    |           |                    |           |
|--------------------|-----------|--------------------|-----------|
| Co(4)#2-O(2)-Co(1) | 96.64(13) | Co(2)#2-O(6)-Co(3) | 94.03(12) |
| Co(4)-O(3)-Co(2)   | 99.37(14) | Co(1)-O(7)-Co(4)#2 | 95.70(13) |
| Co(3)-O(4)-Co(2)   | 98.15(13) | Co(2)-O(8)-Co(4)   | 95.51(13) |

---

Symmetry transformations used to generate equivalent atoms: #1  $-y+3/2, -z+1, x-1/2,$

#2  $z+1/2, -x+3/2, -y+1.$
